# Supplementary material for: Rb3MgB5O10 and LiBaAl(BO3)2: covalent tetrahedra MO4-containing borates with deep-ultraviolet cutoff edges
Source: Royal Society of Chemistry journal article supplement (doi:10.1039/d3dt03288d), 2023-12-07
Supplement: d3dt03288d1.pdf [file d3dt03288d1.pdf]

## Supporting Information

### **Rb<sub>3</sub>MgB<sub>5</sub>O<sub>10</sub> and LiBaAl(BO<sub>3</sub>)<sub>2</sub>: Covalent Tetrahedra MO<sub>4</sub>- Containing Borates with Deep-ultraviolet Cutoff Edges**

Hongkang Su,<sup>a,b</sup> Jiahao Jiao,<sup>a,b</sup> Shibin Wang,<sup>a</sup> Donghai An,<sup>a</sup> and Min Zhang<sup>a,b,\*</sup>

<sup>a</sup>Research Center for Crystal Materials; CAS Key Laboratory of Functional Materials and Devices for Special Environments; Xinjiang Technical Institute of Physics & Chemistry, CAS, 40-1 South Beijing Road, Urumqi 830011, China.

<sup>b</sup>Center of Materials Science and Optoelectronics Engineering, University of Chinese Academy of Sciences, Beijing 100049, China.

\*Corresponding author: zhangmin@ms.xjb.ac.cn.

#### Table of Contents

|                             |    |
|-----------------------------|----|
| Experimental Section.....   | 2  |
| Results and Discussion..... | 7  |
| References .....            | 11 |

## Experimental Procedures

**Reagents.**  $\text{Rb}_2\text{CO}_3$  (99 %),  $\text{Mg}(\text{OH})_2$  (99 %),  $\text{H}_3\text{BO}_3$  ( $\geq 99.5$  %),  $\text{BaCO}_3$  ( $\geq 99.5$  %),  $\text{Al}_2\text{O}_3$  (99.9 %),  $\text{LiF}$  ( $\geq 99.5$  %), and  $\text{NaF}$  ( $\geq 99.5$  %) were purchased from Aladdin and used as received.

### Synthesis.

#### $\text{Rb}_3\text{MgB}_5\text{O}_{10}$

Single crystals of  $\text{Rb}_3\text{MgB}_5\text{O}_{10}$  were grown via spontaneous crystallization. A mixture of  $\text{Rb}_2\text{CO}_3$  (3 mmol, 0.693 g),  $\text{MgO}$  (2 mmol, 0.081 g) and  $\text{H}_3\text{BO}_3$  (10 mmol, 0.618 g) was thoroughly ground. The mixture was then packed into a platinum crucible that was placed into a vertical, programmable temperature furnace. The crucible was gradually heated to 750 °C and held for 6 h. The temperature was slowly cooled down to 650 °C at a rate of 1.5 °C·h<sup>-1</sup>, then cooled down to 550 °C at a rate of 2 °C·h<sup>-1</sup>, and then cooled down to 450 °C at a rate of 3 °C·h<sup>-1</sup>, followed by rapidly cooling to room temperature. Millimeter-sized crystals were selected from the products for single crystal data testing.

The polycrystalline sample of  $\text{Rb}_3\text{MgB}_5\text{O}_{10}$  was obtained by a two-step method. In the first step, the polycrystalline powder of  $\text{MgB}_4\text{O}_7$  was preferentially prepared as follows: a mixture of  $\text{Mg}(\text{OH})_2$  and  $\text{H}_3\text{BO}_3$  with a molar ratio of 1:3 was thoroughly ground, and then slowly heated to 690 °C and held at this temperature for 48 h with several intermediate grindings. In the second step, a mixture of  $\text{MgB}_4\text{O}_7$ ,  $\text{Rb}_2\text{CO}_3$ , and  $\text{H}_3\text{BO}_3$  with a molar ratio of 1:1.5:1 was thoroughly ground, and then slowly heated to 700 °C and held at this temperature for 48 h with several intermediate grindings. The purity of the sample was checked by powder XRD diffraction.

#### $\text{LiBaAl}(\text{BO}_3)_2$

Single crystals of  $\text{LiBaAl}(\text{BO}_3)_2$  were also grown via spontaneous crystallization. A mixture of  $\text{BaCO}_3$  (4 mmol, 0.789 g),  $\text{Al}_2\text{O}_3$  (2 mmol, 0.204 g),  $\text{LiF}$  (10 mmol, 0.259 g),  $\text{NaF}$  (1.2 mmol, 0.05 g), and  $\text{H}_3\text{BO}_3$  (12 mmol, 0.742 g) was thoroughly ground. The mixture was then packed into a platinum crucible that was placed into a vertical, programmable temperature furnace. The crucible was gradually heated to 1000 °C for 20 h and held for 10 h. The temperature was slowly cooled down to 900 °C at a rate of 3 °C·h<sup>-1</sup>, then cooled down to 700 °C at a rate of 2 °C·h<sup>-1</sup>, and then cooled down to 600 °C at a rate of 3 °C·h<sup>-1</sup>, and finally cooled to room temperature by switching off the furnace. The colorless block crystals were obtained for structure determination.

We tried to use direct solid-state reactions under an open system and a two-step method to synthesize polycrystalline samples of  $\text{LiBaAl}(\text{BO}_3)_2$ . For the direct solid-state reactions,  $\text{Li}_2\text{CO}_3$ ,  $\text{BaCO}_3$ ,  $\text{Al}(\text{OH}_3)$ , and  $\text{H}_3\text{BO}_3$  were mixed in a stoichiometric ratio, slowly heated to 300 °C for presenting, and then slowly heated to 600 °C, the phase of  $\text{Li}_2\text{Ba}_4\text{B}_{10}\text{O}_{20}$  began to appear. Continue to heat up until dissolution and no  $\text{LiBaAl}(\text{BO}_3)_2$  phase appears. For the two-step method,  $\text{BaAlBO}_4$  was first synthesized according to the methods mentioned in relevant literature, and then  $\text{BaAlBO}_4$ ,  $\text{Li}_2\text{CO}_3$ , and  $\text{H}_3\text{BO}_3$  were uniformly mixed in a ratio of 2:1:2. After pre-burning at 300 °C, the  $\text{Li}_2\text{Ba}_4\text{B}_{10}\text{O}_{20}$  phase began to appear at 620 °C. Continue heating until it melted and there was no  $\text{LiBaAl}(\text{BO}_3)_2$  phase presented. We finally attempted to spontaneously crystallize using the method of obtaining single crystals and obtained the sample containing  $\text{LiBaAl}(\text{BO}_3)_2$  phase. The XRD pattern is shown in Figure S1. After comparison with Jade 6 software, it was found that the main impurities are  $\text{Li}_2\text{AlBO}_4$  and  $\text{Li}_6\text{Ba}_2\text{B}_4\text{O}_{11}$ , while no compounds corresponding to the impurity peak at 11.8 ° were found yet.

**Structure Determination.** The colorless, transparent bulk single crystals of the title compounds were selected under an optical microscope for structural determination. The single-crystal XRD data

were collected on a Bruker D8 Venture diffractometer assembled with monochromatic Mo-K $\alpha$  ( $\lambda = 0.71073 \text{ \AA}$ ) as the radiation source at room temperature and then integrated by using the SAINT program.<sup>1</sup> All the structures were solved by direct methods and refined through the full-matrix least-squares fitting on  $F_2$  with the OLEX2 software.<sup>2</sup> The crystal structures were solved using the direct method and refined using the SHELXL least-squares refinement package.<sup>3</sup> The structures were checked for possible higher symmetry using the ADDSYM algorithm from the program PLATON.<sup>4</sup> Crystal data and structure refinements of Rb<sub>3</sub>MgB<sub>5</sub>O<sub>10</sub> and LiBaAl(BO<sub>3</sub>)<sub>2</sub> are listed in Tables S1 and S4, respectively. The atomic coordinates and equivalent isotropic displacement parameters selected bond distances and angles of Rb<sub>3</sub>MgB<sub>5</sub>O<sub>10</sub> and LiBaAl(BO<sub>3</sub>)<sub>2</sub> are given in Tables S2-S3 and S5-S6, respectively.

**Powder X-ray Diffraction.** Powder XRD data were collected at room temperature with a Bruker D2 PHASER diffractometer equipped with Cu K $\alpha$  radiation ( $\lambda = 1.5418 \text{ \AA}$ ). Data were collected in the angular ( $2\theta$ ) ranging from 5 to 70 ° for Rb<sub>3</sub>MgB<sub>5</sub>O<sub>10</sub> and 10 to 70 ° for LiBaAl(BO<sub>3</sub>)<sub>2</sub> with a scan step width and a fixed counting time of 0.02 ° and 1 s/step, respectively.

**Infrared (IR) Spectroscopy.** IR spectroscopy of Rb<sub>3</sub>MgB<sub>5</sub>O<sub>10</sub> was inspected with a Shimadzu IR Affinity1 spectrometer at room temperature, and the wavelength ranges from 400 to 4000 cm<sup>-1</sup>. The test was carried out by thoroughly mixing the sample and dried KBr (5 mg of the sample and 500 mg of KBr).

**UV-Vis NIR Diffuse Reflectance Spectroscopy.** The diffuse reflectance spectra were measured by using a Shimadzu Solid Spec-3700 DUV spectrophotometer in the wavelength range of 200–2600 nm at room temperature.

**Computational Methods.** The band structures, partial density of state (PDOS), and optical properties of Rb<sub>3</sub>MgB<sub>5</sub>O<sub>10</sub> and LiBaAl(BO<sub>3</sub>)<sub>2</sub> were calculated by utilizing the CASTEP program.<sup>5</sup> Under the norm-conserving pseudopotentials (NCPs),<sup>6</sup> the following orbital electrons were treated as valence electrons. The functional developed by Perdew-Burke-Ernzerhof (PBE) in generalized gradient approximation (GGA) form was used to describe the exchange-correlation energy. A kinetic energy cutoff of 750 eV is chosen with Monkhorst-Pack k-point meshes spanning less than 0.035/Å in the Brillouin zone.

## Results and Discussion

**Table S1.** Crystal data and structure refinement for  $\text{Rb}_3\text{MgB}_5\text{O}_{10}$ .

| Empirical formula                                           | $\text{Rb}_3\text{MgB}_5\text{O}_{10}$                                                                                          |
|-------------------------------------------------------------|---------------------------------------------------------------------------------------------------------------------------------|
| Formula weight                                              | 494.77                                                                                                                          |
| Temperature                                                 | 293.15 K                                                                                                                        |
| Wavelength                                                  | 0.71073 Å                                                                                                                       |
| Crystal system, space group                                 | Monoclinic, $P2_1/c$                                                                                                            |
| Unit cell dimensions                                        | $a = 10.557(9)$ Å, $\alpha = 90^\circ$<br>$b = 9.449(8)$ Å, $\beta = 122.72(5)^\circ$<br>$c = 13.336(9)$ Å, $\gamma = 90^\circ$ |
| Volume                                                      | 1119.2(16) Å <sup>3</sup>                                                                                                       |
| Z                                                           | 4                                                                                                                               |
| Calculated density                                          | 2.936 g·cm <sup>-3</sup>                                                                                                        |
| Absorption coefficient                                      | 13.160 mm <sup>-1</sup>                                                                                                         |
| $F(000)$                                                    | 912                                                                                                                             |
| Crystal size                                                | 0.257 × 0.13 × 0.099 mm <sup>3</sup>                                                                                            |
| Theta range for data collection                             | 2.293 to 27.546°                                                                                                                |
| Limiting indices                                            | -13 ≤ h ≤ 13, -10 ≤ k ≤ 12, -17 ≤ l ≤ 17                                                                                        |
| Reflections collected / unique                              | 10474 / 2562 [R(int) = 0.0864]                                                                                                  |
| Completeness                                                | 100.0 %                                                                                                                         |
| Data/ restraints/ parameters                                | 2562 / 0 / 173                                                                                                                  |
| Goodness-of-fit on $F^2$                                    | 1.046                                                                                                                           |
| Final R indices [ $F_o^2 > 2\sigma(F_o^2)$ ] <sup>[a]</sup> | $R_1 = 0.0501$ , $wR_2 = 0.0943$                                                                                                |
| R indices (all data) <sup>[a]</sup>                         | $R_1 = 0.0885$ , $wR_2 = 0.1081$                                                                                                |
| Largest diff. peak and hole                                 | 2.315 and -1.401 e <sup>-</sup> Å <sup>-3</sup>                                                                                 |

<sup>[a]</sup> $R_1 = \Sigma||F_o| - |F||\Sigma|F_o|$  and  $wR_2 = [\Sigma w(F_o^2 - F_c^2)^2/\Sigma wF_o^4]^{1/2}$

**Table S2.** Fractional atomic coordinates ( $\times 10^4$ ), equivalent isotropic displacement parameters ( $\text{\AA}^2 \times 10^3$ ), and bond valence sum (BVS) for  $\text{Rb}_3\text{MgB}_5\text{O}_{10}$ .  $U(eq)$  is defined as one third of the trace of the orthogonalized  $U_{ij}$  tensor.

| Atoms                                  | Wyck. | $x$      | $y$      | $z$      | $U_{(eq)}$ | S.O.F. | BVS  |
|----------------------------------------|-------|----------|----------|----------|------------|--------|------|
| $\text{Rb}_3\text{MgB}_5\text{O}_{10}$ |       |          |          |          |            |        |      |
| Rb(1)                                  | 2i    | -127(1)  | -4314(1) | -1626(1) | 45(1)      | 1      | 1.06 |
| Rb(2)                                  | 2i    | 2970(1)  | -5659(1) | -2103(1) | 25(1)      | 1      | 1.15 |
| Rb(3)                                  | 2i    | 4488(1)  | -1702(1) | -1115(1) | 28(1)      | 1      | 0.91 |
| Mg(1)                                  | 2i    | -6839(3) | -1965(3) | -9386(2) | 19(1)      | 1      | 1.97 |
| B(1)                                   | 2i    | -3268(9) | 49(9)    | -5475(7) | 21(2)      | 1      | 3.01 |
| B(2)                                   | 2i    | -3852(9) | -1152(9) | -7321(7) | 18(2)      | 1      | 3.05 |
| B(3)                                   | 2i    | 760(9)   | -3065(9) | -3954(7) | 20(2)      | 1      | 2.99 |
| B(4)                                   | 2i    | -1418(9) | -4554(8) | -4397(7) | 18(2)      | 1      | 3.07 |
| B(5)                                   | 2i    | -1880(9) | -2178(9) | -5334(8) | 23(2)      | 1      | 3.06 |
| O(1)                                   | 2i    | -4750(5) | -1323(5) | -8478(4) | 25(1)      | 1      | 1.97 |
| O(2)                                   | 2i    | -4163(5) | -86(5)   | -6728(4) | 23(1)      | 1      | 2.03 |
| O(3)                                   | 2i    | -3287(6) | 1231(5)  | -4942(4) | 24(1)      | 1      | 1.92 |
| O(4)                                   | 2i    | -2421(6) | -1099(6) | -4835(4) | 24(1)      | 1      | 2.11 |
| O(5)                                   | 2i    | -2568(6) | -1920(5) | -6623(4) | 24(1)      | 1      | 2.25 |
| O(6)                                   | 2i    | -2350(5) | -3567(5) | -5203(5) | 30(1)      | 1      | 2.08 |
| O(7)                                   | 2i    | -244(5)  | -2060(5) | -4729(4) | 24(1)      | 1      | 2.04 |
| O(8)                                   | 2i    | 2235(5)  | -2968(5) | -3457(4) | 22(1)      | 1      | 1.93 |
| O(9)                                   | 2i    | 119(5)   | -4216(5) | -3701(4) | 23(1)      | 1      | 2.15 |
| O(10)                                  | 2i    | -1899(5) | -5771(5) | -4224(4) | 24(1)      | 1      | 1.79 |

**Table S3.** Selected bond lengths (Å) and angles (°) for Rb<sub>3</sub>MgB<sub>5</sub>O<sub>10</sub>.

|                     |            |                     |            |
|---------------------|------------|---------------------|------------|
| Rb(1)-O(3)#1        | 3.080(6)   | O(4)#1-Rb(1)-O(9)   | 97.55(15)  |
| Rb(1)-O(4)#1        | 2.866(6)   | O(4)#1-Rb(1)-O(10)  | 105.38(15) |
| Rb(1)-O(5)#2        | 2.830(6)   | O(5)#2-Rb(1)-O(3)#1 | 131.52(15) |
| Rb(1)-O(7)#1        | 3.065(6)   | O(5)#2-Rb(1)-O(4)#1 | 139.65(15) |
| Rb(1)-O(7)#2        | 2.905(6)   | O(5)#2-Rb(1)-O(7)#2 | 49.28(14)  |
| Rb(1)-O(9)          | 2.917(6)   | O(5)#2-Rb(1)-O(7)#1 | 100.03(15) |
| Rb(1)-O(10)         | 3.224(5)   | O(5)#2-Rb(1)-O(9)   | 122.44(14) |
| Rb(2)-O(1)#4        | 3.270(6)   | O(5)#2-Rb(1)-O(10)  | 100.24(15) |
| Rb(2)-O(2)#3        | 2.876(6)   | O(7)#2-Rb(1)-O(3)#1 | 85.36(15)  |
| Rb(2)-O(3)#1        | 3.122(5)   | O(7)#1-Rb(1)-O(3)#1 | 90.66(13)  |
| Rb(2)-O(4)#1        | 2.968(6)   | O(7)#2-Rb(1)-O(7)#1 | 85.23(15)  |
| Rb(2)-O(5)#4        | 2.742(5)   | O(7)#2-Rb(1)-O(9)   | 151.57(15) |
| Rb(2)-O(6)#4        | 3.367(6)   | O(7)#1-Rb(1)-O(10)  | 94.98(14)  |
| Rb(2)-O(8)          | 2.969(5)   | O(7)#2-Rb(1)-O(10)  | 148.64(14) |
| Rb(2)-O(9)          | 2.920(5)   | O(9)-Rb(1)-O(3)#1   | 88.10(15)  |
| Rb(3)-O(1)#6        | 2.951(6)   | O(9)-Rb(1)-O(7)#1   | 122.53(15) |
| Rb(3)-O(1)#5        | 3.176(6)   | O(9)-Rb(1)-O(10)    | 44.90(14)  |
| Rb(3)-O(2)#6        | 3.192(6)   | O(1)#4-Rb(2)-O(6)#4 | 79.53(13)  |
| Rb(3)-O(3)#1        | 3.055(5)   | O(2)#3-Rb(2)-O(1)#4 | 75.88(14)  |
| Rb(3)-O(4)#3        | 3.443(6)   | O(2)#3-Rb(2)-O(3)#1 | 95.85(15)  |
| Rb(3)-O(6)#3        | 2.881(6)   | O(2)#3-Rb(2)-O(4)#1 | 124.43(14) |
| Rb(3)-O(8)          | 2.969(5)   | O(2)#3-Rb(2)-O(6)#4 | 79.52(14)  |
| Rb(3)-O(10)#7       | 3.128(6)   | O(2)#3-Rb(2)-O(8)   | 78.50(14)  |
|                     |            | O(2)#3-Rb(2)-O(9)   | 125.82(15) |
| Mg(1)-O(1)          | 1.952(6)   | O(3)#1-Rb(2)-O(1)#4 | 121.04(14) |
| Mg(1)-O(3)#8        | 1.964(6)   | O(3)#1-Rb(2)-O(6)#4 | 157.46(13) |
| Mg(1)-O(8)#9        | 1.950(6)   | O(4)#1-Rb(2)-O(1)#4 | 91.69(15)  |
| Mg(1)-O(10)#10      | 1.953(5)   | O(4)#1-Rb(2)-O(3)#1 | 45.49(14)  |
|                     |            | O(4)#1-Rb(2)-O(6)#4 | 151.91(13) |
| B(1)-O(2)           | 1.412(9)   | O(4)#1-Rb(2)-O(8)   | 122.68(15) |
| B(1)-O(3)           | 1.330(10)  | O(5)#4-Rb(2)-O(1)#4 | 45.23(14)  |
| B(1)-O(4)           | 1.371(10)  | O(5)#4-Rb(2)-O(2)#3 | 96.19(16)  |
| B(2)-O(1)           | 1.313(9)   | O(5)#4-Rb(2)-O(3)#1 | 157.79(15) |
| B(2)-O(2)           | 1.425(10)  | O(5)#4-Rb(2)-O(4)#1 | 112.64(16) |
| B(2)-O(5)           | 1.366(9)   | O(5)#4-Rb(2)-O(6)#4 | 44.09(14)  |
| B(3)-O(7)           | 1.381(9)   | O(5)#4-Rb(2)-O(8)   | 115.82(15) |
| B(3)-O(8)           | 1.326(9)   | O(5)#4-Rb(2)-O(9)   | 100.62(15) |
| B(3)-O(9)           | 1.415(10)  | O(8)-Rb(2)-O(1)#4   | 144.96(14) |
| B(4)-O(6)           | 1.360(9)   | O(8)-Rb(2)-O(3)#1   | 84.88(15)  |
| B(4)-O(9)           | 1.403(9)   | O(8)-Rb(2)-O(6)#4   | 72.58(14)  |
| B(4)-O(10)          | 1.326(9)   | O(9)-Rb(2)-O(1)#4   | 144.49(13) |
| B(5)-O(4)           | 1.488(10)  | O(9)-Rb(2)-O(3)#1   | 87.25(15)  |
| B(5)-O(5)           | 1.482(10)  | O(9)-Rb(2)-O(4)#1   | 95.26(16)  |
| B(5)-O(6)           | 1.446(10)  | O(9)-Rb(2)-O(6)#4   | 78.08(15)  |
| B(5)-O(7)           | 1.464(9)   | O(9)-Rb(2)-O(8)     | 47.82(13)  |
|                     |            | O(1)#6-Rb(3)-O(1)#5 | 95.86(14)  |
| O(3)#1-Rb(1)-O(10)  | 125.96(14) | O(1)#6-Rb(3)-O(2)#6 | 45.24(13)  |
| O(4)#1-Rb(1)-O(3)#1 | 46.58(14)  | O(1)#5-Rb(3)-O(2)#6 | 141.09(14) |
| O(4)#1-Rb(1)-O(7)#1 | 47.67(14)  | O(1)#6-Rb(3)-O(3)#1 | 143.90(15) |
| O(4)#1-Rb(1)-O(7)#2 | 97.86(15)  | O(1)#5-Rb(3)-O(4)#3 | 85.10(13)  |

|                      |            |                       |          |
|----------------------|------------|-----------------------|----------|
| O(1)#6-Rb(3)-O(4)#3  | 121.15(14) | O(1)-Mg(1)-O(10)#10   | 111.8(3) |
| O(1)#6-Rb(3)-O(8)    | 107.34(14) | O(8)#9-Mg(1)-O(1)     | 113.7(2) |
| O(1)#6-Rb(3)-O(10)#7 | 86.03(15)  | O(8)#9-Mg(1)-O(3)#8   | 116.3(3) |
| O(2)#6-Rb(3)-O(4)#3  | 112.17(14) | O(8)#9-Mg(1)-O(10)#10 | 107.6(2) |
| O(3)#1-Rb(3)-O(1)#5  | 58.76(14)  | O(10)#10-Mg(1)-O(3)#8 | 104.3(2) |
| O(3)#1-Rb(3)-O(2)#6  | 152.25(13) |                       |          |
| O(3)#1-Rb(3)-O(4)#3  | 84.50(14)  | O(3)-B(1)-O(2)        | 121.0(7) |
| O(3)#1-Rb(3)-O(10)#7 | 60.04(15)  | O(3)-B(1)-O(4)        | 121.7(7) |
| O(6)#3-Rb(3)-O(1)#6  | 77.84(14)  | O(4)-B(1)-O(2)        | 117.3(7) |
| O(6)#3-Rb(3)-O(1)#5  | 88.88(16)  | O(1)-B(2)-O(2)        | 120.2(6) |
| O(6)#3-Rb(3)-O(2)#6  | 82.49(15)  | O(1)-B(2)-O(5)        | 123.8(7) |
| O(6)#3-Rb(3)-O(3)#1  | 122.45(15) | O(5)-B(2)-O(2)        | 116.0(6) |
| O(6)#3-Rb(3)-O(4)#3  | 43.31(14)  | O(7)-B(3)-O(9)        | 115.8(6) |
| O(6)#3-Rb(3)-O(8)    | 124.48(16) | O(8)-B(3)-O(7)        | 123.1(7) |
| O(6)#3-Rb(3)-O(10)#7 | 144.88(15) | O(8)-B(3)-O(9)        | 121.1(7) |
| O(8)-Rb(3)-O(1)#5    | 142.18(14) | O(6)-B(4)-O(9)        | 116.7(6) |
| O(8)-Rb(3)-O(2)#6    | 68.30(14)  | O(10)-B(4)-O(6)       | 123.4(7) |
| O(8)-Rb(3)-O(3)#1    | 86.07(15)  | O(10)-B(4)-O(9)       | 119.8(6) |
| O(8)-Rb(3)-O(4)#3    | 106.49(14) | O(5)-B(5)-O(4)        | 109.9(6) |
| O(8)-Rb(3)-O(10)#7   | 89.98(14)  | O(6)-B(5)-O(4)        | 109.2(7) |
| O(10)#7-Rb(3)-O(1)#5 | 61.73(13)  | O(6)-B(5)-O(5)        | 107.7(6) |
| O(10)#7-Rb(3)-O(2)#6 | 107.74(14) | O(6)-B(5)-O(7)        | 112.4(6) |
| O(10)#7-Rb(3)-O(4)#3 | 140.02(13) | O(7)-B(5)-O(4)        | 109.0(6) |
|                      |            | O(7)-B(5)-O(5)        | 108.6(7) |
| O(1)-Mg(1)-O(3)#8    | 102.7(2)   |                       |          |

---

Symmetry transformations used to generate equivalent atoms:

#1 -x, y-1/2, -z-1/2; #2 x, -y-1/2, z+1/2; #3 x+1, -y-1/2, z+1/2; #4 -x, -y-1, -z-1; #5 x+1, y, z+1; #6 -x, -y, -z-1; #7 -x, y+1/2, -z-1/2; #8 -x-1, y-1/2, -z-3/2; #9 x-1, -y-1/2, z-1/2; #10 -x-1, y+1/2, -z-3/2; #11 x-1, y, z-1; #12 x, -y-1/2, z-1/2.

**Table S4.** Crystal data and structure refinement for LiBaAl(BO<sub>3</sub>)<sub>2</sub>.

| Empirical formula                                                                                                      | LiBaAl(BO <sub>3</sub> ) <sub>2</sub>                                                                                                                          |
|------------------------------------------------------------------------------------------------------------------------|----------------------------------------------------------------------------------------------------------------------------------------------------------------|
| Formula weight                                                                                                         | 288.88                                                                                                                                                         |
| Temperature                                                                                                            | 293.15 K                                                                                                                                                       |
| Wavelength                                                                                                             | 0.71073 Å                                                                                                                                                      |
| Crystal system, space group                                                                                            | Monoclinic, <i>P21/c</i>                                                                                                                                       |
| Unit cell dimensions                                                                                                   | $a = 4.91610(10) \text{ \AA}, \alpha = 90^\circ$<br>$b = 8.7222(2) \text{ \AA}, \beta = 108.2900(10)^\circ$<br>$c = 13.2280(3) \text{ \AA}, \gamma = 90^\circ$ |
| Volume                                                                                                                 | 538.55(2) Å <sup>3</sup>                                                                                                                                       |
| <i>Z</i>                                                                                                               | 4                                                                                                                                                              |
| Calculated density                                                                                                     | 3.563 g·cm <sup>-3</sup>                                                                                                                                       |
| Absorption coefficient                                                                                                 | 7.494 mm <sup>-1</sup>                                                                                                                                         |
| <i>F</i> (000)                                                                                                         | 520                                                                                                                                                            |
| Crystal size                                                                                                           | 0.205 × 0.092 × 0.062 mm <sup>3</sup>                                                                                                                          |
| Theta range for data collection                                                                                        | 2.843 to 27.504°                                                                                                                                               |
| Limiting indices                                                                                                       | -6 ≤ <i>h</i> ≤ 6, -10 ≤ <i>k</i> ≤ 11, -17 ≤ <i>l</i> ≤ 17                                                                                                    |
| Reflections collected / unique                                                                                         | 8775 / 1233 [R(int) = 0.0310]                                                                                                                                  |
| Completeness                                                                                                           | 99.5 %                                                                                                                                                         |
| Data/ restraints/ parameters                                                                                           | 1233 / 0 / 101                                                                                                                                                 |
| Goodness-of-fit on <i>F</i> <sup>2</sup>                                                                               | 1.120                                                                                                                                                          |
| Final <i>R</i> indices [ <i>F</i> <sub>o</sub> <sup>2</sup> > 2σ( <i>F</i> <sub>o</sub> <sup>2</sup> )] <sup>[a]</sup> | <i>R</i> <sub>1</sub> = 0.0109, <i>wR</i> <sub>2</sub> = 0.0257                                                                                                |
| <i>R</i> indices (all data) <sup>[a]</sup>                                                                             | <i>R</i> <sub>1</sub> = 0.0116, <i>wR</i> <sub>2</sub> = 0.0259                                                                                                |
| Largest diff. peak and hole                                                                                            | 0.382 and -0.337 e·Å <sup>-3</sup>                                                                                                                             |

$$^{[a]}R_1 = \Sigma||F_o| - |F||/\Sigma|F_o| \text{ and } wR_2 = [\Sigma w(F_o^2 - F_c^2)^2/\Sigma wF_o^4]^{1/2}$$



**Table S5.** Fractional atomic coordinates ( $\times 10^4$ ), equivalent isotropic displacement parameters ( $\text{\AA}^2 \times 10^3$ ), and bond valence sum (BVS) for  $\text{LiBaAl}(\text{BO}_3)_2$ .  $U(eq)$  is defined as one third of the trace of the orthogonalized  $U_{ij}$  tensor.

| Atoms                          | Wyck. | $x$      | $y$      | $z$      | $U_{(eq)}$ | S.O.F. | BVS  |
|--------------------------------|-------|----------|----------|----------|------------|--------|------|
| $\text{LiBaAl}(\text{BO}_3)_2$ |       |          |          |          |            |        |      |
| Li(1)                          | 2i    | 652(7)   | -475(4)  | -6123(3) | 14(1)      | 1      | 1.11 |
| Ba(1)                          | 2i    | 1624(1)  | -710(1)  | -1372(1) | 11(1)      | 1      | 1.88 |
| Al(1)                          | 2i    | 4297(1)  | -1635(1) | -3932(1) | 8(1)       | 1      | 2.8  |
| B(1)                           | 2i    | -1607(4) | -2377(2) | -4927(2) | 10(1)      | 1      | 2.96 |
| B(2)                           | 2i    | 5448(4)  | 1062(2)  | -2666(2) | 10(1)      | 1      | 3.00 |
| O(1)                           | 2i    | 3525(3)  | -87(1)   | -3214(1) | 12(1)      | 1      | 1.98 |
| O(2)                           | 2i    | 7954(3)  | 1309(2)  | -2825(1) | 14(1)      | 1      | 1.91 |
| O(3)                           | 2i    | 1126(3)  | -1988(1) | -4978(1) | 10(1)      | 1      | 2.11 |
| O(4)                           | 2i    | 7155(3)  | -1312(2) | -4427(1) | 12(1)      | 1      | 1.97 |
| O(5)                           | 2i    | -2818(3) | -3701(2) | -5345(1) | 14(1)      | 1      | 1.85 |
| O(6)                           | 2i    | 4554(3)  | 1808(2)  | -1912(1) | 17(1)      | 1      | 1.95 |

**Table S6.** Selected bond lengths (Å) and angles (°) for LiBaAl(BO<sub>3</sub>)<sub>2</sub>.

|                     |             |                     |            |
|---------------------|-------------|---------------------|------------|
| Li(1)-O(1)#1        | 2.024(4)    | O(2)#5-Ba(1)-O(6)   | 67.06(4)   |
| Li(1)-O(2)#3        | 1.880(4)    | O(3)#4-Ba(1)-O(1)   | 143.41(3)  |
| Li(1)-O(3)          | 1.967(3)    |                     |            |
| Li(1)-O(4)#3        | 1.905(4)    | O(3)#4-Ba(1)-O(2)#6 | 67.66(4)   |
|                     |             | O(3)#4-Ba(1)-O(2)#5 | 137.19(4)  |
| Ba(1)-O(1)          | 2.9202(13)  | O(3)#4-Ba(1)-O(5)#4 | 48.71(3)   |
| Ba(1)-O(2)#5        | 2.8053(13)  | O(3)#4-Ba(1)-O(6)   | 151.71(4)  |
| Ba(1)-O(2)#6        | 2.8413(13)  | O(5)#7-Ba(1)-O(1)   | 121.56(4)  |
| Ba(1)-O(3)#4        | 2.7891(12)  | O(5)#8-Ba(1)-O(1)   | 85.22(4)   |
| Ba(1)-O(5)#7        | 2.7821(14)  | O(5)#8-Ba(1)-O(2)#6 | 80.34(4)   |
| Ba(1)-O(5)#4        | 2.9566(13)  | O(5)#7-Ba(1)-O(2)#5 | 95.14(4)   |
| Ba(1)-O(5)#8        | 2.6916(13)  | O(5)#8-Ba(1)-O(2)#5 | 142.97(4)  |
| Ba(1)-O(6)          | 2.8380(13)  | O(5)#7-Ba(1)-O(2)#6 | 149.36(4)  |
|                     |             | O(5)#7-Ba(1)-O(3)#4 | 87.32(4)   |
| Al(1)-O(1)          | 1.7597(14)  | O(5)#8-Ba(1)-O(3)#4 | 79.32(4)   |
| Al(1)-O(3)          | 1.7569(14)  | O(5)#7-Ba(1)-O(5)#4 | 74.41(4)   |
| Al(1)-O(4)          | 1.7495(13)  | O(5)#8-Ba(1)-O(5)#7 | 77.74(4)   |
| Al(1)-O(6)#6        | 1.7358(14)  | O(5)#8-Ba(1)-O(5)#4 | 120.93(5)  |
|                     |             |                     |            |
| B(1)-O(3)           | 1.408(2)    | O(5)#8-Ba(1)-O(6)   | 76.11(4)   |
| B(1)-O(4)#5         | 1.387(2)    | O(5)#7-Ba(1)-O(6)   | 74.02(4)   |
| B(1)-O(5)           | 1.337(2)    | O(6)-Ba(1)-O(1)     | 47.59(4)   |
| B(2)-O(1)           | 1.412(2)    | O(6)-Ba(1)-O(2)#6   | 120.79(4)  |
| B(2)-O(2)           | 1.331(2)    | O(6)-Ba(1)-O(5)#4   | 139.18(4)  |
| B(2)-O(6)           | 1.372(2)    |                     |            |
|                     |             | O(3)-Al(1)-O(1)     | 105.74(6)  |
| O(2)#3-Li(1)-O(1)#1 | 109.19(17)  | O(4)-Al(1)-O(1)     | 114.41(7)  |
| O(2)#3-Li(1)-O(3)   | 109.15(17)  | O(4)-Al(1)-O(3)     | 110.56(7)  |
| O(2)#3-Li(1)-O(4)#3 | 107.77(17)  | O(6)#6-Al(1)-O(1)   | 109.56(7)  |
| O(3)-Li(1)-O(1)#1   | 110.81(16)  | O(6)#6-Al(1)-O(3)   | 113.52(7)  |
| O(4)#3-Li(1)-O(1)#1 | 110.07(16)  | O(6)#6-Al(1)-O(4)   | 103.28(7)  |
| O(4)#3-Li(1)-O(3)   | 109.78(17)  |                     |            |
|                     |             | O(4)#5-B(1)-O(3)    | 115.44(16) |
| O(1)-Ba(1)-O(5)#4   | 153.04(4)   | O(5)-B(1)-O(3)      | 119.76(17) |
| O(2)#5-Ba(1)-O(1)   | 67.51(4)    | O(5)-B(1)-O(4)#5    | 124.80(17) |
| O(2)#6-Ba(1)-O(1)   | 77.20(4)    | O(2)-B(2)-O(1)      | 122.51(17) |
| O(2)#5-Ba(1)-O(2)#6 | 115.153(17) | O(2)-B(2)-O(6)      | 124.15(17) |
| O(2)#6-Ba(1)-O(5)#4 | 99.42(4)    | O(6)-B(2)-O(1)      | 113.19(16) |
| O(2)#5-Ba(1)-O(5)#4 | 90.84(4)    |                     |            |

Symmetry transformations used to generate equivalent atoms:

#1 -x,-y,-z-1; #2 x,-y-1/2,z-1/2; #3 -x+1,-y,-z-1; #4 x,-y-1/2,z+1/2; #5 x-1,y,z; #6 -x+1,y-1/2,-z-1/2;  
#7 -x,y+1/2,-z-1/2; #8 x+1,-y-1/2,z+1/2; #9 -x,y-1/2,-z-1/2; #10 x+1,y,z; #11 -x+1,y+1/2,-z-1/2;  
#12 x-1,-y-1/2,z-1/2.

**Table S7.** Investigation of the reported disorder-free borate containing isolated [MgO<sub>4</sub>] groups.

| No. | Formula                                                                                                                                | Space group             | Symmetry | B-O basic units                       | Mg-O groups                  | Ref.      |
|-----|----------------------------------------------------------------------------------------------------------------------------------------|-------------------------|----------|---------------------------------------|------------------------------|-----------|
| 1   | Na <sub>3</sub> MgB <sub>5</sub> O <sub>10</sub>                                                                                       | <i>Pbca</i>             | CS       | [BO <sub>3</sub> ]+[BO <sub>4</sub> ] | isolated [MgO <sub>4</sub> ] | 49        |
| 2   | Cs <sub>4</sub> Mg <sub>4</sub> (BO <sub>3</sub> ) <sub>4</sub>                                                                        | <i>P2<sub>1</sub>/c</i> | CS       | [BO <sub>3</sub> ]                    | isolated [MgO <sub>4</sub> ] | 50        |
| 3   | Rb <sub>3</sub> MgB <sub>5</sub> O <sub>10</sub>                                                                                       | <i>P2<sub>1</sub>/c</i> | CS       | [BO <sub>3</sub> ]+[BO <sub>4</sub> ] | isolated [MgO <sub>4</sub> ] | This work |
| 4   | Rb <sub>18</sub> Mg <sub>6</sub> (B <sub>5</sub> O <sub>10</sub> ) <sub>3</sub> (B <sub>7</sub> O <sub>14</sub> ) <sub>2</sub> F       | <i>C2/c</i>             | CS       | [BO <sub>3</sub> ]+[BO <sub>4</sub> ] | isolated [MgO <sub>4</sub> ] | 51        |
| 5   | Cs <sub>18</sub> Mg <sub>6</sub> (B <sub>5</sub> O <sub>10</sub> ) <sub>3</sub> (B <sub>7</sub> O <sub>14</sub> ) <sub>2</sub> F       | <i>C2/c</i>             | CS       | [BO <sub>3</sub> ]+[BO <sub>4</sub> ] | isolated [MgO <sub>4</sub> ] | 51        |
| 6   | Ca <sub>16</sub> Mg(B <sub>13</sub> O <sub>17</sub> (OH) <sub>12</sub> ) <sub>4</sub> Cl <sub>6</sub> (H <sub>2</sub> O) <sub>28</sub> | <i>Pba2</i>             | NCS      | [BO <sub>3</sub> ]+[BO <sub>4</sub> ] | isolated [MgO <sub>4</sub> ] | 52        |

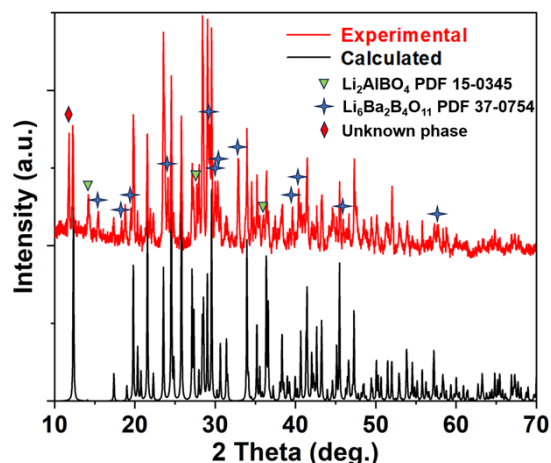

**Figure S1.** Comparison of XRD patterns of  $\text{LiBaAl}(\text{BO}_3)_2$  samples obtained by spontaneous crystallization method with theoretical results.

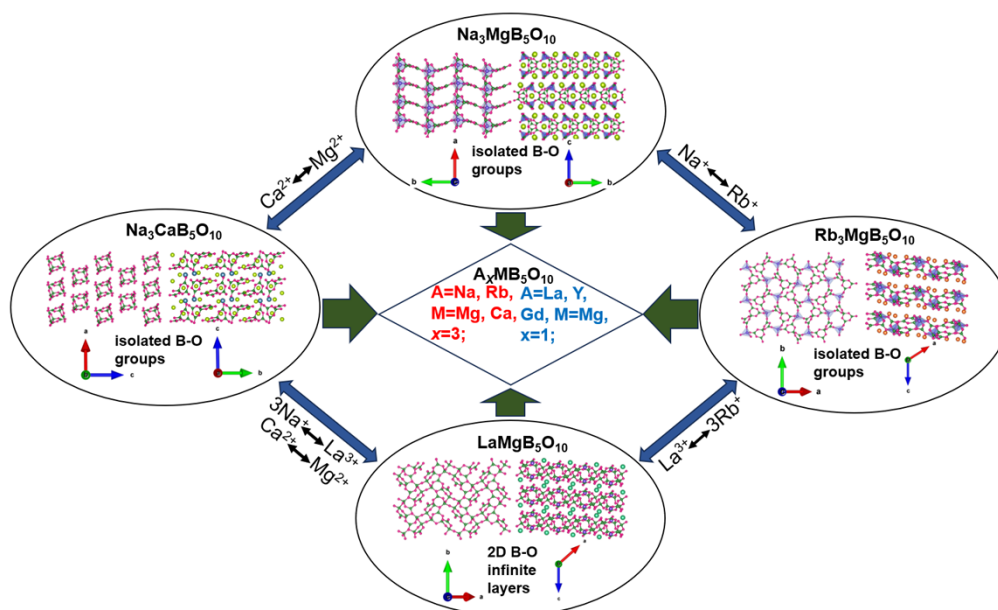

**Figure S2.** The structural transformation between  $A_x\text{MB}_5\text{O}_{10}$  ( $A=\text{Na}, \text{Rb}, A=\text{La}, \text{Y}, M=\text{Mg}, \text{Ca}, \text{Gd}, M=\text{Mg}, x=3; A=\text{La}, \text{Y}, \text{Gd}, M=\text{Mg}, x=1$ ).

## References

1. SAINT. Version 7.60A, Bruker Analytical X-ray Instruments, Inc., Madison, WI, 2008.
2. O. Dolomanov, L. Bourhis, R. Gildea, J. Howard, H. Puschmann, *J. Appl. Crystallogr.*, 2009, **42**, 339-341.
3. G. Sheldrick, *Acta Crystallogr. A*, 2015, **71**, 3-8.
4. A. Spek, *J. Appl. Crystallogr.*, 2003, **36**, 7-13.
5. S. Clark, M. Segall, C. Pickard, P. Hasnip, M. Probert, K. Refson, M. Payne, *Z. Kristallogr. - Cryst. Mater.* 2005, **220**, 567-570.
6. D. Hamann, M. Schlüter, C. Chiang, *Phys. Rev. Lett.* 1979, **43**, 1494-1497.
